# Supplementary material for: Evolution of the FGF Gene Family
Source: PubMed Central journal article supplement (PMC3420111; doi:10.1155/2012/298147), 2012-08-07

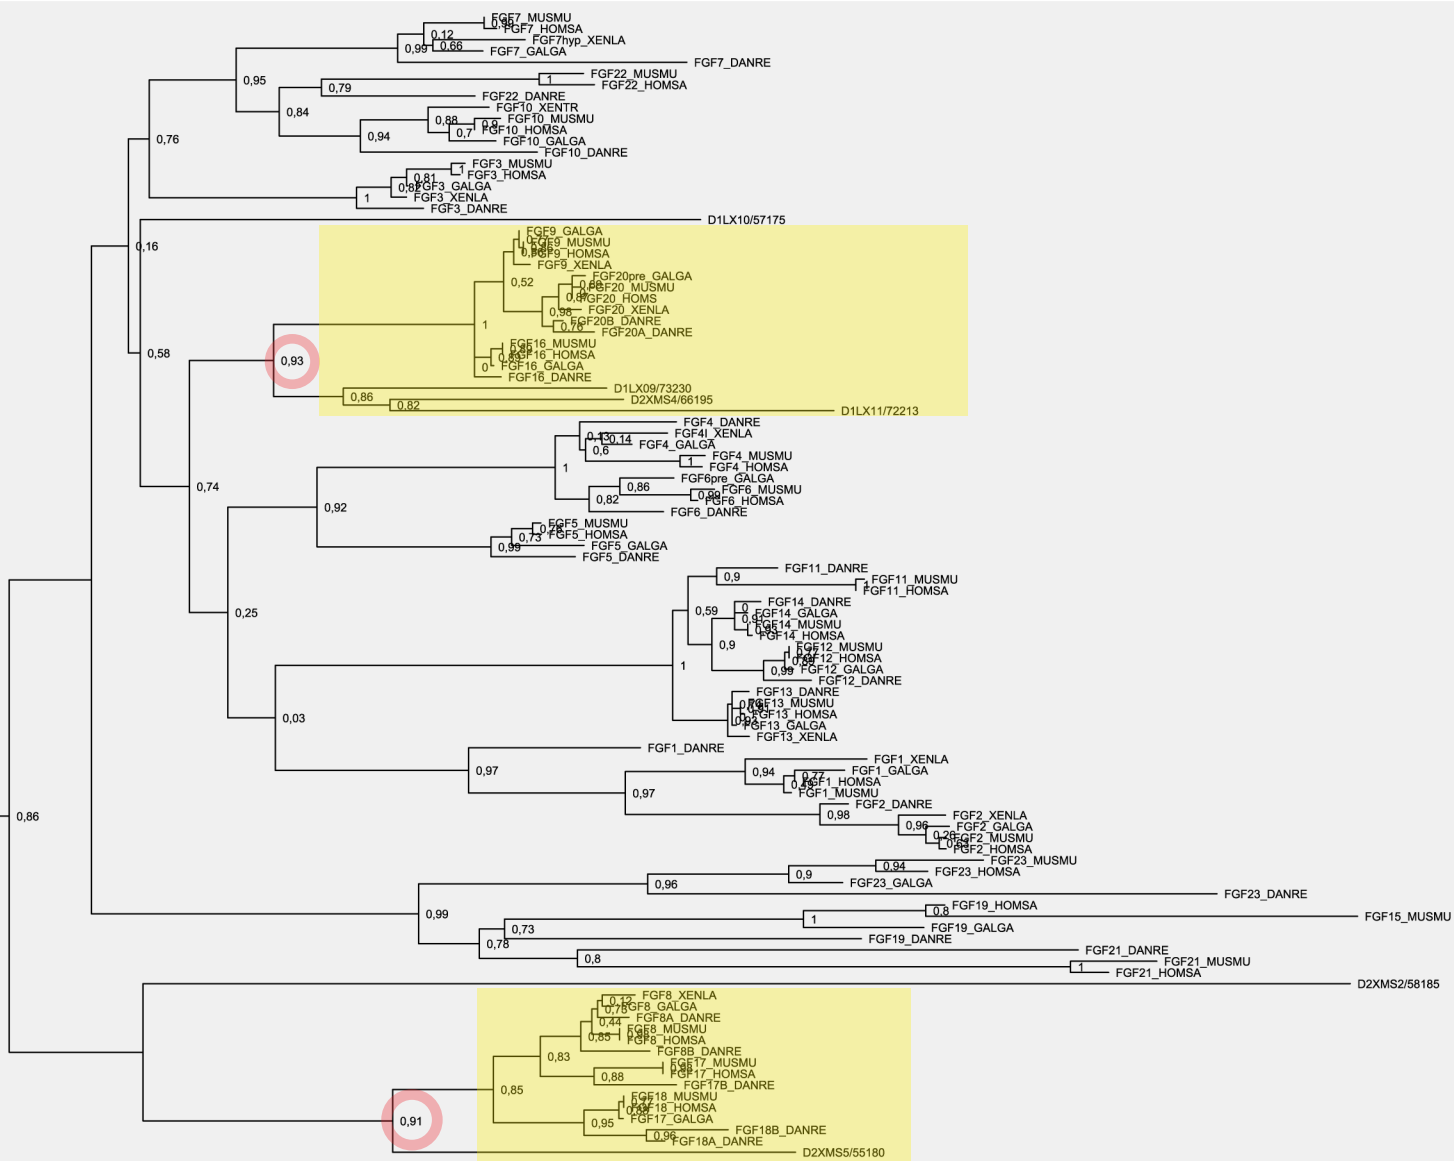

Supplement: 298147.f3.pdf [file 298147.f3.pdf]
